# Supplementary material for: Ccq1-Tpz1TPP1 interaction facilitates telomerase and SHREC association with telomeres in fission yeast
Source: PubMed Central journal article supplement — Mol Biol Cell. 2015 Nov 1;26(21):3857–66. doi: 10.1091/mbc.E15-07-0481 (PMC4626069; doi:10.1091/mbc.e15-07-0481), 2015-11-01
Supplement: supp_E15-07-0481v1_CombinedSupMats.pdf [file supp_E15-07-0481v1_CombinedSupMats.pdf]

# Supplemental Materials

*Molecular Biology of the Cell*

Moser et al.

**SUPPLEMENTAL MATERIALS**

**Ccq1-Tpz1<sup>TPP1</sup> interaction facilitates telomerase and SHREC  
association with telomeres in fission yeast**

Bettina A. Moser<sup>a</sup>, Olga N. Raguimova<sup>a</sup>, and Toru M. Nakamura<sup>a</sup>

<sup>a</sup>Department of Biochemistry and Molecular Genetics, College of Medicine, University of Illinois at Chicago, Chicago, Illinois, USA.

**Supplemental Figures S1-S4**

**Supplemental Tables S1-S4**

**Supplemental References**

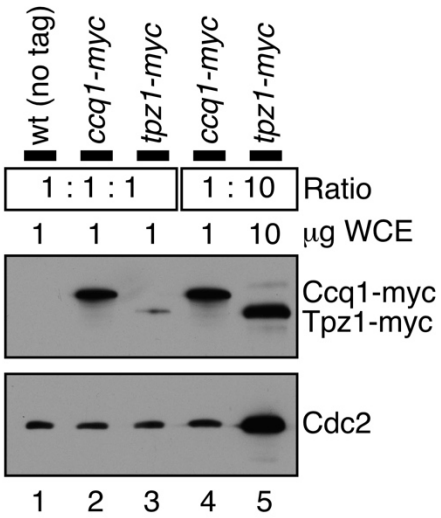

**Supplemental Figure S1. Comparison of expression levels for Ccq1 and Tpz1<sup>TPP1</sup>.** The indicated amounts of whole cell extracts from strains that carry either myc-tagged Ccq1 or Tpz1<sup>TPP1</sup> were analyzed by anti-myc western blot analysis. Analysis indicated that Ccq1 expression level is at least 10-fold greater than Tpz1<sup>TPP1</sup> expression level.

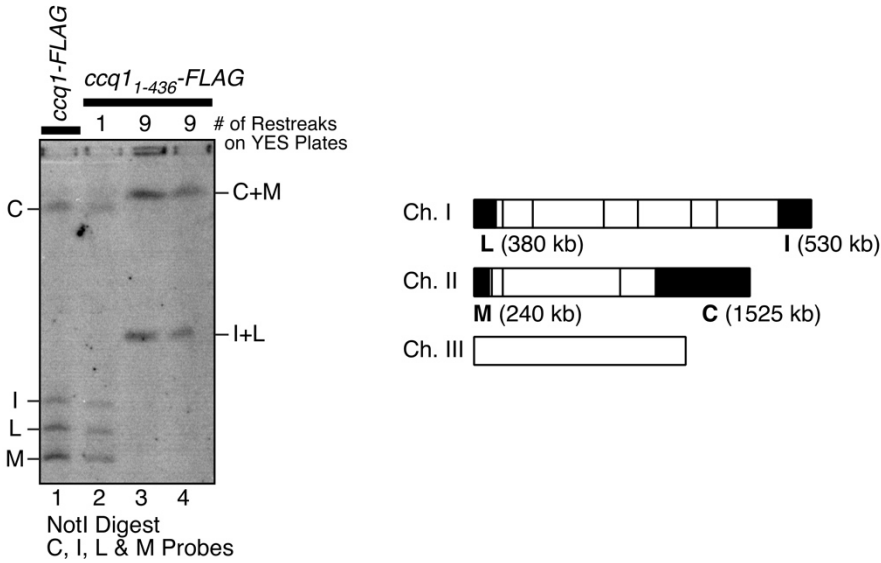

**Supplemental Figure S2. Characterization of chromosome structure for *ccq1*<sub>1-436</sub> cells.** Pulsed-field gel analysis found that after successive restreaks on YES plates, *ccq1*<sub>1-436</sub> cells survive by circularizing chromosomes. Samples were prepared from early (1x) or extensively restreaked (9x) samples as indicated. A NotI restriction map of *S. pombe* chromosomes is also shown to the right. Telomeric NotI fragments (C, I, L, and M) are indicated with black boxes.

**Analysis of shelterin subunit Ccq1**  
Moser *et al.*

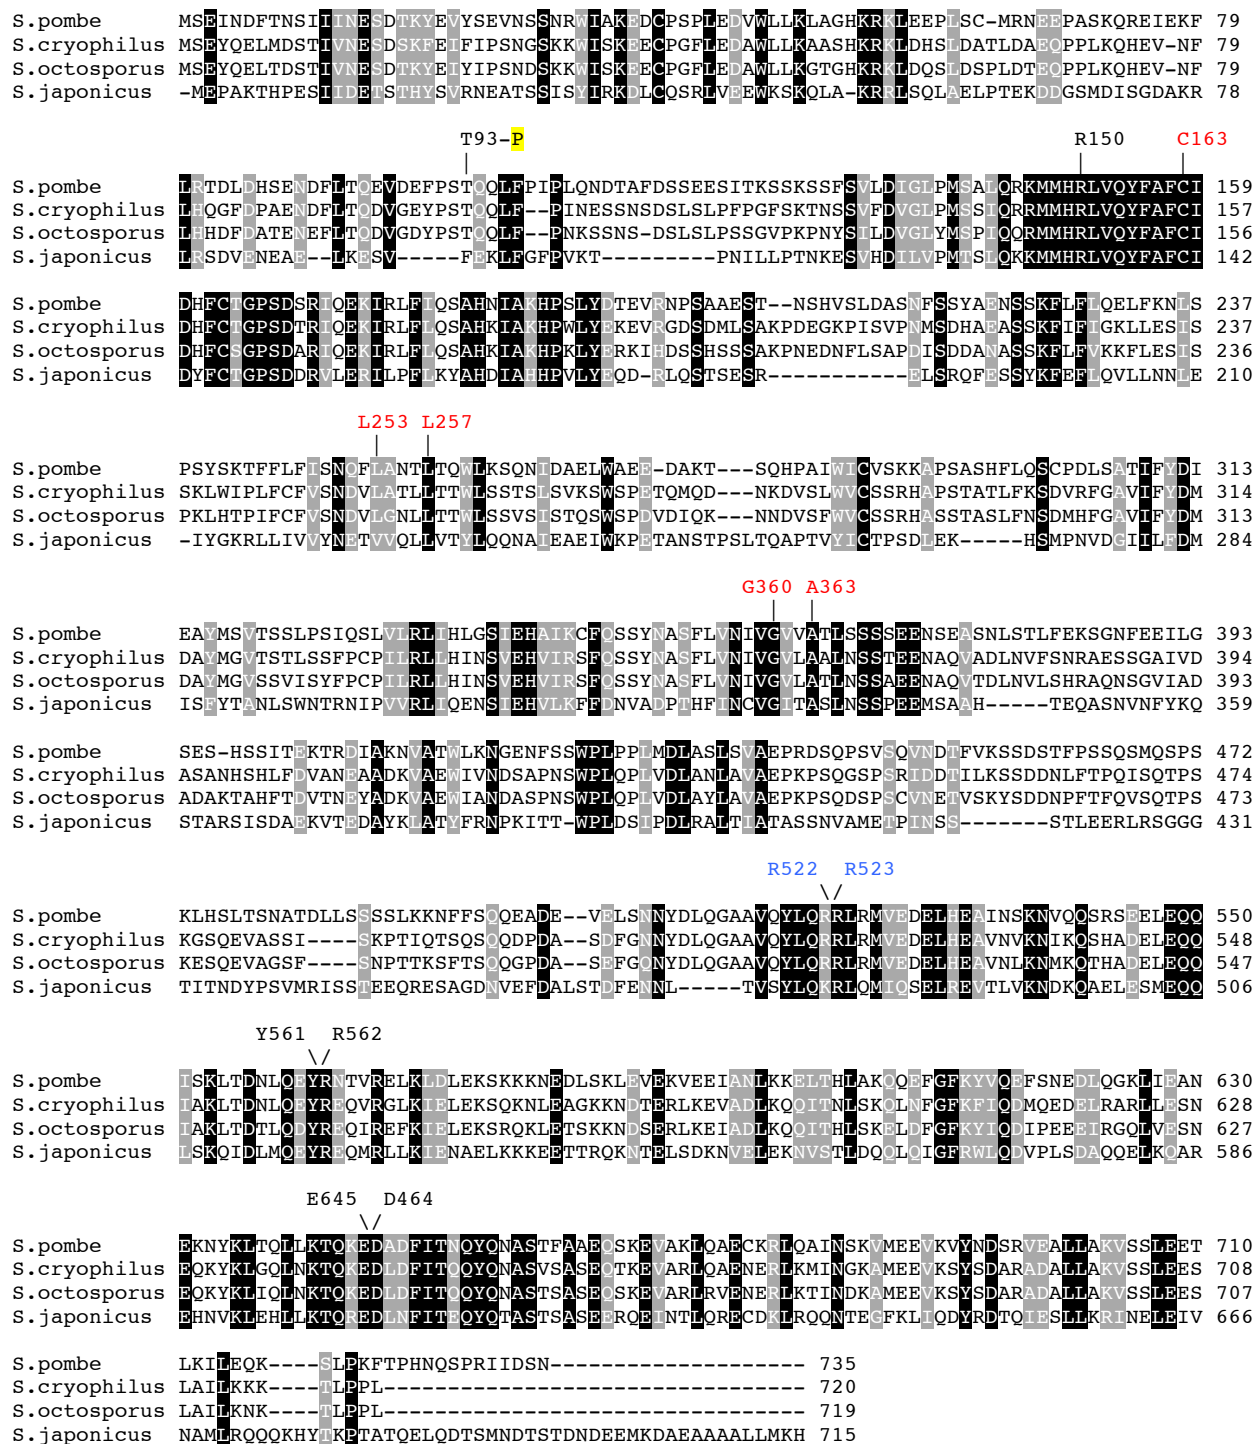

■ Identical amino acids  
 ■ Similar amino acids (Similar amino acids are defined as: GAVLI, FYW, CM, ST, KRH, DENQ, P.)

**Supplemental Figure S3. Sequence alignment of Ccq1 from closely related fission yeast species.** Ccq1 sequences from *S. pombe*, *S. cryophilus*, *S. octosporus*, and *S. japonicus* (Rhind *et al.*, 2011) were aligned using MUSCLE (Multiple Sequence Comparison by Log-Expectation) program (Edgar, 2004). Amino acid residues mutated in the current study, and Ccq1 Thr93 phosphorylation site are indicated.

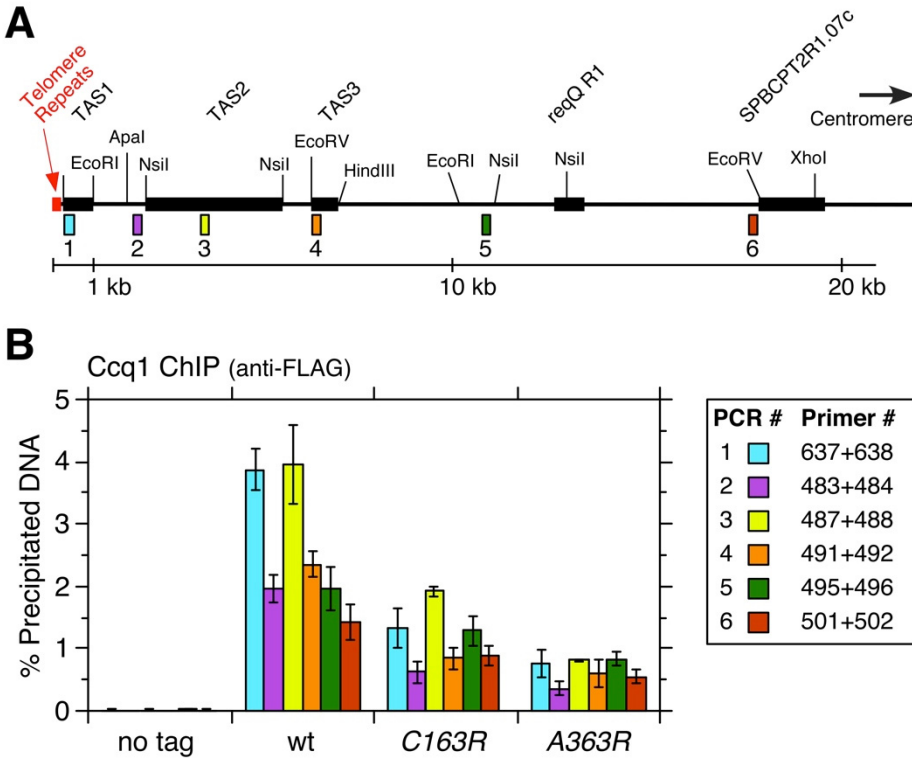

**Supplemental Figure S4. Ccq1 binding distribution at sub-telomere regions for wild-type and Ccq1-Tpz1<sup>TPP1</sup> interaction disruption mutants of Ccq1.** (A) A schematic map of telomere and sub-telomere regions based on the *S. pombe* genome sequencing project (Wood *et al.*, 2002) and our own sequencing of sub-telomere regions. Main features are indicated above. Colored bars marked with numbers indicate locations of PCR products for ChIP analysis shown in (B). (B) Ccq1 ChIP analysis for sub-telomere regions. Results are ordered from boxes 1 to 6, and color-coded as in the map shown in (A), and primer numbers for PCR are given. Primer sequences used in ChIP are summarized in Supplemental Table S3. Error bars represent standard error of the mean from at least three experimental replicates.

**Table S1** Fission yeast strains used in this study.

| Figure | Strain  | Full Genotype <sup>a</sup>                                             |                                                                                                                                             |                                                                                                                     |
|--------|---------|------------------------------------------------------------------------|---------------------------------------------------------------------------------------------------------------------------------------------|---------------------------------------------------------------------------------------------------------------------|
| 1C     | 1       | TN2411 <i>ccq1</i> <sup>+</sup> (no tag)                               | <i>h</i> <sup>-</sup> <i>his3-D1</i>                                                                                                        |                                                                                                                     |
|        | 2       | YTC6732 <i>ccq1-FLAG</i>                                               | <i>h</i> <sup>-</sup> <i>his3-D1 ccq1</i> <sup>+</sup> ::5FLAG-kanMX6                                                                       |                                                                                                                     |
|        | 3-5     | TN13162, BAM13523, BAM13524 <i>ccq1</i> <sub>1-632</sub> -FLAG         | <i>h</i> <sup>+</sup> <i>his3-D1 ccq1</i> <sub>(1-632)</sub> ::5FLAG-kanMX6 (13162 1x; 13523 4x; 13524 9x)                                  |                                                                                                                     |
|        | 6-8     | TN13160, BAM13521, BAM13522 <i>ccq1</i> <sub>1-583</sub> -FLAG         | <i>h</i> <sup>+</sup> <i>his3-D1 ccq1</i> <sub>(1-583)</sub> ::5FLAG-kanMX6 (13160 1x; 13521 4x; 13522 9x)                                  |                                                                                                                     |
|        | 9-11    | TN13158, BAM13519, BAM13520 <i>ccq1</i> <sub>1-500</sub> -FLAG         | <i>h</i> <sup>+</sup> <i>his3-D1 ccq1</i> <sub>(1-500)</sub> ::5FLAG-kanMX6 (13158 1x; 13519 4x; 13520 9x)                                  |                                                                                                                     |
|        | 12-14   | TN13156, BAM13511, BAM13512 <i>ccq1</i> <sub>1-436</sub> -FLAG         | <i>h</i> <sup>+</sup> <i>his3-D1 ccq1</i> <sub>(1-436)</sub> ::5FLAG-kanMX6 (13156 1x; 13511 4x; 13512 9x)                                  |                                                                                                                     |
|        | 1D      | 1                                                                      | TN2411 <i>ccq1</i> <sup>+</sup> (no tag)                                                                                                    | <i>h</i> <sup>-</sup> <i>his3-D1</i>                                                                                |
|        |         | 2-4                                                                    | YTC6732 <i>ccq1-FLAG</i>                                                                                                                    | <i>h</i> <sup>-</sup> <i>his3-D1 ccq1</i> <sup>+</sup> ::5FLAG-kanMX6                                               |
|        |         | 5                                                                      | TN13162 <i>ccq1</i> <sub>1-632</sub> -FLAG                                                                                                  | <i>h</i> <sup>+</sup> <i>his3-D1 ccq1</i> <sub>(1-632)</sub> ::5FLAG-kanMX6                                         |
|        |         | 6                                                                      | TN13160 <i>ccq1</i> <sub>1-583</sub> -FLAG                                                                                                  | <i>h</i> <sup>+</sup> <i>his3-D1 ccq1</i> <sub>(1-583)</sub> ::5FLAG-kanMX6                                         |
|        |         | 7                                                                      | TN13158 <i>ccq1</i> <sub>1-500</sub> -FLAG                                                                                                  | <i>h</i> <sup>+</sup> <i>his3-D1 ccq1</i> <sub>(1-500)</sub> ::5FLAG-kanMX6                                         |
|        |         | 8                                                                      | TN13156 <i>ccq1</i> <sub>1-436</sub> -FLAG                                                                                                  | <i>h</i> <sup>+</sup> <i>his3-D1 ccq1</i> <sub>(1-436)</sub> ::5FLAG-kanMX6                                         |
| 1E     |         | 1                                                                      | TN13162 <i>ccq1</i> <sub>1-632</sub> -FLAG                                                                                                  | <i>h</i> <sup>+</sup> <i>his3-D1 ccq1</i> <sub>(1-632)</sub> ::5FLAG-kanMX6                                         |
|        |         | 2                                                                      | TN13340 <i>ccq1</i> <sub>1-632</sub> -FLAG <i>tpz1-myc</i>                                                                                  | <i>h</i> <sup>-</sup> <i>his3-D1 tpz1</i> <sup>+</sup> ::13myc-hphMX6 <i>ccq1</i> <sub>(1-632)</sub> ::5FLAG-kanMX6 |
|        | 3       | TN13160 <i>ccq1</i> <sub>1-583</sub> -FLAG                             | <i>h</i> <sup>+</sup> <i>his3-D1 ccq1</i> <sub>(1-583)</sub> ::5FLAG-kanMX6                                                                 |                                                                                                                     |
|        | 4       | TN13336 <i>ccq1</i> <sub>1-583</sub> -FLAG <i>tpz1-myc</i>             | <i>h</i> <sup>-</sup> <i>his3-D1 tpz1</i> <sup>+</sup> ::13myc-hphMX6 <i>ccq1</i> <sub>(1-583)</sub> ::5FLAG-kanMX6                         |                                                                                                                     |
|        | 5       | TN13156 <i>ccq1</i> <sub>1-436</sub> -FLAG                             | <i>h</i> <sup>+</sup> <i>his3-D1 ccq1</i> <sub>(1-436)</sub> ::5FLAG-kanMX6                                                                 |                                                                                                                     |
|        | 6       | TN13328 <i>ccq1</i> <sub>1-436</sub> -FLAG <i>tpz1-myc</i>             | <i>h</i> <sup>-</sup> <i>his3-D1 tpz1</i> <sup>+</sup> ::13myc-hphMX6 <i>ccq1</i> <sub>(1-436)</sub> ::5FLAG-kanMX6                         |                                                                                                                     |
|        | 7       | TN13158 <i>ccq1</i> <sub>1-500</sub> -FLAG                             | <i>h</i> <sup>+</sup> <i>his3-D1 ccq1</i> <sub>(1-500)</sub> ::5FLAG-kanMX6                                                                 |                                                                                                                     |
|        | 8       | TN13332 <i>ccq1</i> <sub>1-500</sub> -FLAG <i>tpz1-myc</i>             | <i>h</i> <sup>-</sup> <i>his3-D1 tpz1</i> <sup>+</sup> ::13myc-hphMX6 <i>ccq1</i> <sub>(1-500)</sub> ::5FLAG-kanMX6                         |                                                                                                                     |
| 1F     | TN2411  | <i>his</i> <sup>-</sup>                                                | <i>h</i> <sup>-</sup> <i>his3-D1</i>                                                                                                        |                                                                                                                     |
|        | TN3784  | <i>his</i> <sup>+</sup>                                                | <i>h</i> <sup>-</sup>                                                                                                                       |                                                                                                                     |
|        | CF52    | telomere (1L):: <i>his3</i> <sup>+</sup> <i>ccq1</i> <sup>+</sup> (wt) | <i>h</i> <sup>90</sup> <i>ura4-DS/E ade6-M210 his3-D1 his3</i> <sup>+</sup> ::tel(1L)                                                       |                                                                                                                     |
|        | TN13459 | telomere (1L):: <i>his3</i> <sup>+</sup> <i>ccq1</i> <sub>1-632</sub>  | <i>h</i> <sup>-</sup> <i>ura4-DS/E</i> or <i>ura4-D18 his3-D1 ccq1</i> <sub>(1-632)</sub> ::5FLAG-kanMX6 <i>his3</i> <sup>+</sup> ::tel(1L) |                                                                                                                     |
|        | TN13455 | telomere (1L):: <i>his3</i> <sup>+</sup> <i>ccq1</i> <sub>1-583</sub>  | <i>h</i> <sup>-</sup> <i>his3-D1 ccq1</i> <sub>(1-583)</sub> ::5FLAG-kanMX6 <i>his3</i> <sup>+</sup> ::tel(1L)                              |                                                                                                                     |
|        | TN13399 | telomere (1L):: <i>his3</i> <sup>+</sup> <i>ccq1</i> <sub>1-500</sub>  | <i>h</i> <sup>-</sup> <i>his3-D1 ccq1</i> <sub>(1-500)</sub> ::5FLAG-kanMX6 <i>his3</i> <sup>+</sup> ::tel(1L)                              |                                                                                                                     |
|        | TN13395 | telomere (1L):: <i>his3</i> <sup>+</sup> <i>ccq1</i> <sub>1-436</sub>  | <i>h</i> <sup>-</sup> <i>his3-D1 ccq1</i> <sub>(1-436)</sub> ::5FLAG-kanMX6 <i>his3</i> <sup>+</sup> ::tel(1L)                              |                                                                                                                     |
|        | TN9133  | telomere (1L):: <i>his3</i> <sup>+</sup> <i>ccq1Δ</i>                  | <i>h</i> <sup>-</sup> <i>his3-D1 ccq1Δ</i> ::hphMX <i>his3</i> <sup>+</sup> ::tel(1L)                                                       |                                                                                                                     |
| 2B     | 1,19    | TN2411 <i>ccq1</i> <sup>+</sup> (no tag)                               | <i>h</i> <sup>-</sup> <i>his3-D1</i>                                                                                                        |                                                                                                                     |
|        | 2,18,20 | YTC6732 <i>ccq1-FLAG</i>                                               | <i>h</i> <sup>-</sup> <i>his3-D1 ccq1</i> <sup>+</sup> ::5FLAG-kanMX6                                                                       |                                                                                                                     |
|        | 3-5     | OR11529, OR11749 <i>ccq1-R150A-FLAG</i>                                | <i>h</i> <sup>-</sup> <i>ade6-M210 his3-D1 ccq1-R150A</i> ::5FLAG-kanMX6 (11529 1x; 11749 9x; did not keep 5x stock)                        |                                                                                                                     |
|        | 6-8     | TN10611, TN10613 <i>ccq1-C163R-FLAG</i>                                | <i>h</i> <sup>-</sup> <i>ade6-M210 his3-D1 ccq1-C163R</i> ::5FLAG-kanMX6 (10611 1x; 10613 9x; did not keep 5x stock)                        |                                                                                                                     |
|        | 9-11    | OR11530, OR11750 <i>ccq1-L253R-FLAG</i>                                | <i>h</i> <sup>-</sup> <i>ade6-M210 his3-D1 ccq1-L253R</i> ::5FLAG-kanMX6 (11530 1x; 11750 9x; did not keep 5x stock)                        |                                                                                                                     |
|        | 12-14   | OR11531, OR11752 <i>ccq1-L257R-FLAG</i>                                | <i>h</i> <sup>-</sup> <i>ade6-M210 his3-D1 ccq1-L257R</i> ::5FLAG-kanMX6 (11531 1x; 11752 9x; did not keep 5x stock)                        |                                                                                                                     |
|        | 15-17   | OR11532, OR11754 <i>ccq1-G360R-FLAG</i>                                | <i>h</i> <sup>-</sup> <i>ade6-M210 his3-D1 ccq1-G360R</i> ::5FLAG-kanMX6 (11532 1x; 11754 9x; did not keep 5x stock)                        |                                                                                                                     |
|        | 21-23   | TB11538, OR11760 <i>ccq1-A363R-FLAG</i>                                | <i>h</i> <sup>-</sup> <i>ade6-M216 his3-D1 ccq1-A363R</i> ::5FLAG-kanMX6 (11538 1x; 11760 9x; did not keep 5x stock)                        |                                                                                                                     |
|        | 24-26   | OR11533, OR11756 <i>ccq1-R522A,R523A-FLAG</i>                          | <i>h</i> <sup>-</sup> <i>ade6-M210 his3-D1 ccq1-R522A,R523A</i> ::5FLAG-kanMX6 (11533 1x; 11756 9x; did not keep 5x stock)                  |                                                                                                                     |
|        | 27-29   | OR11534, OR11758 <i>ccq1-Y561A,R562A-FLAG</i>                          | <i>h</i> <sup>-</sup> <i>ade6-M210 his3-D1 ccq1-Y561A,R562A</i> ::5FLAG-kanMX6 (11534 1x; 11758 9x; did not keep 5x stock)                  |                                                                                                                     |
|        | 30-32   | OR11535, OR11759 <i>ccq1-E645A,D646A-FLAG</i>                          | <i>h</i> <sup>-</sup> <i>ade6-M210 his3-D1 ccq1-E645A,D646A</i> ::5FLAG-kanMX6 (11535 1x; 11759 9x; did not keep 5x stock)                  |                                                                                                                     |
|        | 2C      | 1,7                                                                    | TN7506 <i>ccq1-FLAG</i> (wt)                                                                                                                | <i>h</i> <sup>-</sup> <i>his3-D1 tpz1</i> <sup>+</sup> ::13myc-kanMX6 <i>ccq1</i> <sup>+</sup> ::5FLAG-kanMX6       |
|        |         | 2                                                                      | BAM10855 <i>ccq1-T93A-FLAG</i>                                                                                                              | <i>h</i> <sup>+</sup> <i>his3-D1 tpz1</i> <sup>+</sup> ::13myc-kanMX6 <i>ccq1-T93A</i> ::5FLAG-kanMX6               |
|        |         | 3                                                                      | TN11914 <i>ccq1-R150A-FLAG</i>                                                                                                              | <i>h</i> <sup>+</sup> <i>ade6-M210 his3-D1 tpz1</i> <sup>+</sup> ::13myc-hphMX6 <i>ccq1-R150A</i> ::5FLAG-kanMX6    |

**Analysis of shelterin subunit Ccq1**  
Moser *et al.*

|    |       |                                             |                                                                         |                                                                                                                                                                                                                                           |
|----|-------|---------------------------------------------|-------------------------------------------------------------------------|-------------------------------------------------------------------------------------------------------------------------------------------------------------------------------------------------------------------------------------------|
|    | 4     | TN10675                                     | <i>ccq1-C163R-FLAG</i>                                                  | <i>h<sup>+</sup> ade6-M210 his3-D1 tpz1<sup>+</sup>::13myc-kanMX6 ccq1-C163R::5FLAG-kanMX6</i>                                                                                                                                            |
|    | 5     | TN11917                                     | <i>ccq1-L253R-FLAG</i>                                                  | <i>h<sup>-</sup> ade6-M210 his3-D1 tpz1<sup>+</sup>::13myc-hphMX6 ccq1-L253R::5FLAG-kanMX6</i>                                                                                                                                            |
|    | 6     | TN11919                                     | <i>ccq1-L257R-FLAG</i>                                                  | <i>h<sup>-</sup> ade6-M210 his3-D1 tpz1<sup>+</sup>::13myc-hphMX6 ccq1-L257R::5FLAG-kanMX6</i>                                                                                                                                            |
|    | 8     | TN11920                                     | <i>ccq1-G360R-FLAG</i>                                                  | <i>h<sup>+</sup> ade6-M210 his3-D1 tpz1<sup>+</sup>::13myc-hphMX6 ccq1-G360R::5FLAG-kanMX6</i>                                                                                                                                            |
|    | 9     | TN11922                                     | <i>ccq1-A363R-FLAG</i>                                                  | <i>h<sup>+</sup> ade6-M216 his3-D1 tpz1<sup>+</sup>::13myc-hphMX6 ccq1-A363R::5FLAG-kanMX6</i>                                                                                                                                            |
|    | 10    | TN11925                                     | <i>ccq1-R522A,R523A-FLAG</i>                                            | <i>h<sup>-</sup> ade6-M210 his3-D1 tpz1<sup>+</sup>::13myc-hphMX6 ccq1-R522A,R523A::5FLAG-kanMX6</i>                                                                                                                                      |
|    | 11    | TN11926                                     | <i>ccq1-Y561A,R562A-FLAG</i>                                            | <i>h<sup>+</sup> ade6-M210 his3-D1 tpz1<sup>+</sup>::13myc-hphMX6 ccq1-Y561A,R562A::5FLAG-kanMX6</i>                                                                                                                                      |
|    | 12    | TN11928                                     | <i>ccq1-E645A,D646A-FLAG</i>                                            | <i>h<sup>+</sup> ade6-M210 his3-D1 tpz1<sup>+</sup>::13myc-hphMX6 ccq1-E645A,D646A::5FLAG-kanMX6</i>                                                                                                                                      |
| 2D | 1     | YTC6732                                     | <i>ccq1-FLAG</i>                                                        | <i>h<sup>-</sup> his3-D1 ccq1<sup>+</sup>::5FLAG-kanMX6</i>                                                                                                                                                                               |
|    | 2     | TN7506                                      | <i>ccq1-FLAG (wt) tpz1-myc</i>                                          | <i>h<sup>-</sup> his3-D1 tpz1<sup>+</sup>::13myc-kanMX6 ccq1<sup>+</sup>::5FLAG-kanMX6</i>                                                                                                                                                |
|    | 3     | BAM10855                                    | <i>ccq1-T93A-FLAG tpz1-myc</i>                                          | <i>h<sup>+</sup> his3-D1 tpz1<sup>+</sup>::13myc-kanMX6 ccq1-T93A::5FLAG-kanMX6</i>                                                                                                                                                       |
|    | 4     | TN11914                                     | <i>ccq1-R150A-FLAG tpz1-myc</i>                                         | <i>h<sup>+</sup> ade6-M210 his3-D1 tpz1<sup>+</sup>::13myc-hphMX6 ccq1-R150A::5FLAG-kanMX6</i>                                                                                                                                            |
|    | 5     | TN10675                                     | <i>ccq1-C163R-FLAG tpz1-myc</i>                                         | <i>h<sup>+</sup> ade6-M210 his3-D1 tpz1<sup>+</sup>::13myc-kanMX6 ccq1-C163R::5FLAG-kanMX6</i>                                                                                                                                            |
|    | 6     | TN11917                                     | <i>ccq1-L253R-FLAG tpz1-myc</i>                                         | <i>h<sup>-</sup> ade6-M210 his3-D1 tpz1<sup>+</sup>::13myc-hphMX6 ccq1-L253R::5FLAG-kanMX6</i>                                                                                                                                            |
|    | 7     | TN11919                                     | <i>ccq1-L257R-FLAG tpz1-myc</i>                                         | <i>h<sup>-</sup> ade6-M210 his3-D1 tpz1<sup>+</sup>::13myc-hphMX6 ccq1-L257R::5FLAG-kanMX6</i>                                                                                                                                            |
|    | 8     | TN11920                                     | <i>ccq1-G360R-FLAG tpz1-myc</i>                                         | <i>h<sup>+</sup> ade6-M210 his3-D1 tpz1<sup>+</sup>::13myc-hphMX6 ccq1-G360R::5FLAG-kanMX6</i>                                                                                                                                            |
|    | 9     | TN11922                                     | <i>ccq1-A363R-FLAG tpz1-myc</i>                                         | <i>h<sup>+</sup> ade6-M216 his3-D1 tpz1<sup>+</sup>::13myc-hphMX6 ccq1-A363R::5FLAG-kanMX6</i>                                                                                                                                            |
|    | 10    | TN11925                                     | <i>ccq1-R522A,R523A-FLAG tpz1-myc</i>                                   | <i>h<sup>-</sup> ade6-M210 his3-D1 tpz1<sup>+</sup>::13myc-hphMX6 ccq1-R522A,R523A::5FLAG-kanMX6</i>                                                                                                                                      |
|    | 11    | TN11926                                     | <i>ccq1-Y561A,R562A-FLAG tpz1-myc</i>                                   | <i>h<sup>+</sup> ade6-M210 his3-D1 tpz1<sup>+</sup>::13myc-hphMX6 ccq1-Y561A,R562A::5FLAG-kanMX6</i>                                                                                                                                      |
|    | 12    | TN11928                                     | <i>ccq1-E645A,D646A-FLAG tpz1-myc</i>                                   | <i>h<sup>+</sup> ade6-M210 his3-D1 tpz1<sup>+</sup>::13myc-hphMX6 ccq1-E645A,D646A::5FLAG-kanMX6</i>                                                                                                                                      |
| 3A | 1,18  | TN2411                                      | <i>ccq1<sup>+</sup> (no tag)</i>                                        | <i>h<sup>-</sup> his3-D1</i>                                                                                                                                                                                                              |
|    | 2,17  | YTC6732                                     | <i>ccq1-FLAG</i>                                                        | <i>h<sup>-</sup> his3-D1 ccq1<sup>+</sup>::5FLAG-kanMX6</i>                                                                                                                                                                               |
|    | 3     | TN9258                                      | <i>ccq1Δ</i>                                                            | <i>h<sup>-</sup> his3-D1 ccq1Δ::hphMX (linear chromosomes)</i>                                                                                                                                                                            |
|    | 4     | TN9259                                      | <i>ccq1Δ</i>                                                            | <i>h<sup>-</sup> his3-D1 ccq1Δ::hphMX (circular chromosomes)</i>                                                                                                                                                                          |
|    | 5-8   | TN10611,<br>TN10612,<br>TN10613,<br>TN13532 | <i>ccq1-C163R-FLAG</i>                                                  | <i>h<sup>-</sup> ade6-M210 his3-D1 ccq1-C163R::5FLAG-kanMX6 (10611 1x; 10612 3x; 10613 8x; 13532 16x)</i>                                                                                                                                 |
|    | 9-11  | BAM13533,<br>BAM13534,<br>BAM13535          | <i>ccq1-C163R-FLAG</i>                                                  | <i>h<sup>+</sup> ade6-M210 his3-D1 ccq1-C163R::5FLAG-kanMX6 (derived from dissection of diploid 11526) (13533 1x; 13534 5x small colonies; 13535 5x large colonies)</i>                                                                   |
|    | 12-14 |                                             | <i>ccq1-C163R-FLAG</i>                                                  | <i>h<sup>?</sup> ade6-M210/M216 his3-D1 ccq1-C163R::5FLAG-kanMX6 (derived from dissection of diploid 11526 but did not create entries in our strain collection) (lane #12 1x; lane #13 5x small colonies; lane #14 5x large colonies)</i> |
|    | 15    | TN11930                                     | <i>ccq1-C163R-FLAG poz1Δ</i>                                            | <i>h<sup>+</sup> his3-D1 poz1Δ::natMX6 ccq1-C163R::5FLAG-kanMX6</i>                                                                                                                                                                       |
|    | 16    | TN11931<br>TN11526                          | <i>ccq1-C163R-FLAG poz1Δ</i><br><i>ccq1-C163R-FLAG/ccq1<sup>+</sup></i> | <i>h<sup>-</sup> ade6-M210 his3-D1 poz1Δ::natMX6 ccq1-C163R::5FLAG-kanMX6</i><br><i>h<sup>+</sup>/h<sup>90</sup> ade6-M210/ade6-M216 his3-D1/his3-D1 ccq1-C163R::5FLAG-kanMX6/ccq1<sup>+</sup></i>                                        |
| 3C | 1     | YTC6732                                     | <i>ccq1-FLAG</i>                                                        | <i>h<sup>-</sup> his3-D1 ccq1<sup>+</sup>::5FLAG-kanMX6</i>                                                                                                                                                                               |
|    | 2     | TN9258                                      | <i>ccq1Δ</i>                                                            | <i>h<sup>-</sup> his3-D1 ccq1Δ::hphMX (linear chromosomes)</i>                                                                                                                                                                            |
|    | 3     | TN9259                                      | <i>ccq1Δ</i>                                                            | <i>h<sup>-</sup> his3-D1 ccq1Δ::hphMX (circular chromosomes)</i>                                                                                                                                                                          |
|    | 4-7   | TN10611,<br>TN10612,<br>TN10613,<br>TN13532 | <i>ccq1-C163R-FLAG</i>                                                  | <i>h<sup>-</sup> ade6-M210 his3-D1 ccq1-C163R::5FLAG-kanMX6 (10611 1x; 10612 3x; 10613 8x; 13532 16x)</i>                                                                                                                                 |
|    | 8-10  | BAM13533,<br>BAM13534,<br>BAM13535          | <i>ccq1-C163R-FLAG</i>                                                  | <i>h<sup>+</sup> ade6-M210 his3-D1 ccq1-C163R::5FLAG-kanMX6 (derived from dissection of diploid 11526) (13533 1x; 13534 5x small colonies; 13535 5x large colonies)</i>                                                                   |
|    | 11-13 |                                             | <i>ccq1-C163R-FLAG</i>                                                  | <i>h<sup>?</sup> ade6-M210/M216 his3-D1 ccq1-C163R::5FLAG-kanMX6 (derived from dissection of diploid 11526 but did not create entries in our strain collection) (lane #12 1x; lane #13 5x small colonies; lane #14 5x large colonies)</i> |
| 3D | 1     | YTC8354                                     | <i>poz1Δ</i>                                                            | <i>h<sup>-</sup> ade6-M216 his3-D1 poz1Δ::natMX6</i>                                                                                                                                                                                      |
|    | 2     | YTC6732                                     | <i>ccq1-FLAG</i>                                                        | <i>h<sup>-</sup> his3-D1 ccq1<sup>+</sup>::5FLAG-kanMX6</i>                                                                                                                                                                               |
|    | 3     | TN10611                                     | <i>ccq1-C163R-FLAG</i>                                                  | <i>h<sup>-</sup> ade6-M210 his3-D1 ccq1-C163R::5FLAG-kanMX6</i>                                                                                                                                                                           |
|    | 4     | TN10531                                     | <i>ccq1-FLAG poz1Δ</i>                                                  | <i>h<sup>-</sup> his3-D1 poz1Δ::natMX6 ccq1-5FLAG:kanMX6</i>                                                                                                                                                                              |
|    | 5     | TN11930                                     | <i>ccq1-C163R-FLAG poz1Δ</i>                                            | <i>h<sup>+</sup> his3-D1 poz1Δ::natMX6 ccq1-C163R::5FLAG-kanMX6</i>                                                                                                                                                                       |
|    | 6     | TN11931                                     | <i>ccq1-C163R-FLAG poz1Δ</i>                                            | <i>h<sup>-</sup> ade6-M210 his3-D1 poz1Δ::natMX6 ccq1-C163R::5FLAG-kanMX6</i>                                                                                                                                                             |



**Analysis of shelterin subunit Ccq1**  
Moser *et al.*

|    |     |                     |                                                      |                                                                                                                        |
|----|-----|---------------------|------------------------------------------------------|------------------------------------------------------------------------------------------------------------------------|
| 4A |     | TN9496              | <i>ccq1-C163R</i>                                    | <i>h<sup>-</sup> ade6-M210 his3-D1 ccq1-C163R::natMX</i>                                                               |
|    |     | TN9542              | <i>ccq1-L253R</i>                                    | <i>h<sup>-</sup> ade6-M210 his3-D1 ccq1-L253R::natMX</i>                                                               |
|    |     | TN9547              | <i>ccq1-L257R</i>                                    | <i>h<sup>-</sup> ade6-M210 his3-D1 ccq1-L257R::natMX</i>                                                               |
|    |     | TN9462              | <i>ccq1-G360R</i>                                    | <i>h<sup>+</sup> ade6-M210 his3-D1 ccq1-G360R::natMX</i>                                                               |
|    |     | TN9551              | <i>ccq1-A363R</i>                                    | <i>h<sup>-</sup> ade6-M216 his3-D1 ccq1-A363R::natMX</i>                                                               |
|    |     | TN6584              | <i>ccq1Δ</i>                                         | <i>h<sup>-</sup> ade6-M210 his3-D1 ccq1Δ::hphMX</i>                                                                    |
|    |     | CF199               | <i>ccq1<sup>+</sup></i>                              | <i>h<sup>-</sup> ade6-M210 his3-D1</i>                                                                                 |
| 4B | 1   | TN11335             | <i>chk1-myc ccq1-C163R</i>                           | <i>h<sup>-</sup> ade6-M216 his3-D1 ccq1-C163R::5FLAG-kanMX6 chk1+::9myc-2HA-6His-ura4<sup>+</sup></i>                  |
|    | 2   | TN6591              | <i>chk1-myc ccq1-L253R</i>                           | <i>h<sup>-</sup> ade6-M216 his3-D1 ccq1-L253R::5FLAG-kanMX6 chk1+::9myc-2HA-6His-ura4<sup>+</sup></i>                  |
|    | 3   | TN6593              | <i>chk1-myc ccq1-L257R</i>                           | <i>h<sup>-</sup> ade6-M216 his3-D1 ccq1-L257R::5FLAG-kanMX6 chk1+::9myc-2HA-6His-ura4<sup>+</sup></i>                  |
|    | 4   | TN6595              | <i>chk1-myc ccq1-G360R</i>                           | <i>h<sup>-</sup> ade6-M216 his3-D1 ccq1-G360R::5FLAG-kanMX6 chk1+::9myc-2HA-6His-ura4<sup>+</sup></i>                  |
|    | 5   | TN6597              | <i>chk1-myc ccq1-A363R</i>                           | <i>h<sup>-</sup> ade6-M216 his3-D1 ccq1-A363R::5FLAG-kanMX6 chk1+::9myc-2HA-6His-ura4<sup>+</sup></i>                  |
|    | 6   | TN11330             | <i>chk1-myc ccq1Δ</i>                                | <i>h<sup>-</sup> ade6-M216 his3-D1 ccq1Δ::hphMX chk1+::9myc-2HA-6His-ura4<sup>+</sup></i>                              |
|    | 7,8 | TN890               | <i>chk1-myc ccq1<sup>+</sup></i>                     | <i>h<sup>-</sup> ade6-M216 his3-D1 chk1+::9myc-2HA-6His-ura4<sup>+</sup></i>                                           |
| 4C |     | TN2411              | <i>rad26<sup>+</sup> (no tag) ccq1<sup>+</sup></i>   | <i>h<sup>-</sup> his3-D1</i>                                                                                           |
|    |     | TN12428,<br>TN12429 | <i>myc-rad26 ccq1<sup>+</sup></i>                    | <i>his3-D1 ccq1<sup>+</sup>::natMX 9myc-rad26<sup>+</sup>::hphMX6 (12428 h<sup>+</sup>; 12429 h)</i>                   |
|    |     | TN12439,<br>TN12440 | <i>myc-rad26 ccq1-C163R</i>                          | <i>ade6-M210 his3-D1 ccq1-C163R::natMX6 9myc-rad26<sup>+</sup>::hphMX6 (12439 h<sup>+</sup>; 12440 h<sup>+</sup>)</i>  |
|    |     | TN12443,<br>TN12444 | <i>myc-rad26 ccq1-A363R</i>                          | <i>h<sup>-</sup> ade6-M216 his3-D1 ccq1-A363R::natMX 9myc-rad26<sup>+</sup>::hphMX6</i>                                |
|    |     | TN12435,<br>TN12436 | <i>myc-rad26 ccq1Δ</i>                               | <i>his3-D1 ccq1Δ::hphMX 9myc-rad26<sup>+</sup>::hphMX6 (12435 h<sup>-</sup> ade6-M216; 12436 h<sup>+</sup>)</i>        |
|    |     | TN2411<br>YTC6732   | <i>ccq1<sup>+</sup> (no tag)</i><br><i>ccq1-FLAG</i> | <i>h<sup>-</sup> his3-D1</i><br><i>h<sup>-</sup> his3-D1 ccq1<sup>+</sup>::5FLAG-kanMX6</i>                            |
| 5A |     | TN10611             | <i>ccq1-C163R-FLAG</i>                               | <i>h<sup>-</sup> ade6-M210 his3-D1 ccq1-C163R::5FLAG-kanMX6</i>                                                        |
|    |     | OR11530             | <i>ccq1-L253R-FLAG</i>                               | <i>h<sup>-</sup> ade6-M210 his3-D1 ccq1-L253R::5FLAG-kanMX6</i>                                                        |
|    |     | OR11531             | <i>ccq1-L257R-FLAG</i>                               | <i>h<sup>-</sup> ade6-M210 his3-D1 ccq1-L257R::5FLAG-kanMX6</i>                                                        |
|    |     | OR11532             | <i>ccq1-G360R-FLAG</i>                               | <i>h<sup>-</sup> ade6-M210 his3-D1 ccq1-G360R::5FLAG-kanMX6</i>                                                        |
|    |     | TB11538             | <i>ccq1-A363R-FLAG</i>                               | <i>h<sup>-</sup> ade6-M216 his3-D1 ccq1-A363R::5FLAG-kanMX6</i>                                                        |
|    | 5B  |                     | TN2411                                               | <i>trt1<sup>+</sup> (no tag) ccq1<sup>+</sup></i>                                                                      |
|    |     | TN7706,<br>TN7707   | <i>trt1-myc ccq1<sup>+</sup></i>                     | <i>h<sup>-</sup> his3-D1 trt1+::G8-13myc-kanMX6</i>                                                                    |
|    |     | TN12852,<br>TN12853 | <i>trt1-myc ccq1-C163R</i>                           | <i>h<sup>-</sup> his3-D1 trt1+::G8-13myc-kanMX6 ccq1-C163R::natMX</i>                                                  |
|    |     | TN12856,<br>TN12857 | <i>trt1-myc ccq1-A363R</i>                           | <i>h<sup>-</sup> his3-D1 trt1+::G8-13myc-kanMX6 ccq1-A363R::natMX</i>                                                  |
|    |     | TN8960,<br>TN8963   | <i>trt1-myc ccq1Δ</i>                                | <i>his3-D1 trt1<sup>+</sup>::G8-13myc-kanMX6 ccq1Δ::hphMX (8960 h<sup>+</sup>; 8963 h)</i>                             |
| 5C |     | 1                   | TN7506                                               | <i>ccq1-FLAG</i>                                                                                                       |
|    | 2   | YTC10106            | <i>ccq1-FLAG rap1Δ</i>                               | <i>h<sup>-</sup> his3-D1 rap1Δ::ura4<sup>+</sup> tpz1<sup>+</sup>::13myc-kanMX6 ccq1<sup>+</sup>::5FLAG-kanMX6</i>     |
|    | 3   | TN10675             | <i>ccq1-C163R-FLAG</i>                               | <i>h<sup>+</sup> ade6-M210 his3-D1 tpz1<sup>+</sup>::13myc-kanMX6 ccq1-C163R::5FLAG-kanMX6</i>                         |
|    | 4   | TN10686             | <i>ccq1-C163R-FLAG rap1Δ</i>                         | <i>h<sup>-</sup> ade6-M210 his3-D1 rap1Δ::ura4<sup>+</sup> tpz1<sup>+</sup>::13myc-kanMX6 ccq1-C163R::5FLAG-kanMX6</i> |
|    | 5   | TN11922             | <i>ccq1-A363R-FLAG tpz1<sup>+</sup></i>              | <i>h<sup>+</sup> ade6-M216 his3-D1 tpz1<sup>+</sup>::13myc-hphMX6 ccq1-A363R::5FLAG-kanMX6</i>                         |
|    | 6   | TN12794             | <i>ccq1-A363R-FLAG tpz1<sup>+</sup> rap1Δ</i>        | <i>h<sup>-</sup> ade6-M216 his3-D1 rap1Δ::ura4<sup>+</sup> tpz1<sup>+</sup>::13myc-hphMX6 ccq1-A363R::5FLAG-kanMX6</i> |
|    | 7   | BAM10855            | <i>ccq1-T93A-FLAG</i>                                | <i>h<sup>+</sup> his3-D1 tpz1<sup>+</sup>::13myc-kanMX6 ccq1-T93A::5FLAG-kanMX6</i>                                    |
|    | 8   | BAM10857            | <i>ccq1-T93A-FLAG rap1Δ</i>                          | <i>h<sup>-</sup> ade6-M210 his3-D1 rap1Δ::ura4<sup>+</sup> tpz1<sup>+</sup>::13myc-kanMX6 ccq1-T93A::5FLAG-kanMX6</i>  |
|    | 9   | TN9011              | <i>ccq1Δ</i>                                         | <i>h<sup>-</sup> his3-D1 tpz1<sup>+</sup>::13myc-kanMX6 ccq1Δ::hphMX</i>                                               |
|    | 10  | LK9883              | <i>ccq1Δ rap1Δ</i>                                   | <i>h<sup>-</sup> his3-D1 rap1Δ::ura4<sup>+</sup> tpz1<sup>+</sup>::13myc-kanMX6 ccq1Δ::hphMX</i>                       |
|    | 11  | JH11174             | <i>ccq1-FLAG tpz1-L449R</i>                          | <i>h<sup>-</sup> tpz1-L449R::13myc-kanMX6 ccq1<sup>+</sup>::5FLAG-kanMX6</i>                                           |
|    | 12  | JH11544             | <i>ccq1-FLAG tpz1-L449R rap1Δ</i>                    | <i>h<sup>-</sup> his3-D1 rap1Δ::ura4<sup>+</sup> tpz1-L449R::13myc-kanMX6 ccq1<sup>+</sup>::5FLAG-kanMX6</i>           |

**Analysis of shelterin subunit Ccq1**  
Moser *et al.*

|     |                  |                                                               |                                                                                                                                       |                                                                                                                    |
|-----|------------------|---------------------------------------------------------------|---------------------------------------------------------------------------------------------------------------------------------------|--------------------------------------------------------------------------------------------------------------------|
| 6A  | TN2411           | <i>his<sup>-</sup></i>                                        | <i>h<sup>-</sup> his3-D1</i>                                                                                                          |                                                                                                                    |
|     | TN3784           | <i>his<sup>+</sup></i>                                        | <i>h<sup>-</sup></i>                                                                                                                  |                                                                                                                    |
|     | TN9125           | telomere (1L):: <i>his3<sup>+</sup> ccq1<sup>+</sup></i> (wt) | <i>h<sup>-</sup> ade6-M210 his3-D1 his3<sup>+</sup>::tel(1L)</i>                                                                      |                                                                                                                    |
|     | TN9658           | telomere (1L):: <i>his3<sup>+</sup> ccq1-R150R</i>            | <i>h<sup>-</sup> ade6-M210 his3-D1 ccq1-R150A::5FLAG-kanMX6 his3<sup>+</sup>::tel(1L)</i>                                             |                                                                                                                    |
|     | TN9666           | telomere (1L):: <i>his3<sup>+</sup> ccq1-C163R</i>            | <i>h<sup>-</sup> ade6-M210 his3-D1 ccq1-C163R::5FLAG-kanMX6 his3<sup>+</sup>::tel(1L)</i>                                             |                                                                                                                    |
|     | TN9668           | telomere (1L):: <i>his3<sup>+</sup> ccq1-L253R</i>            | <i>h<sup>-</sup> ade6-M210 his3-D1 ccq1-L253R::5FLAG-kanMX6 his3<sup>+</sup>::tel(1L)</i>                                             |                                                                                                                    |
|     | TN9670           | telomere (1L):: <i>his3<sup>+</sup> ccq1-L257R</i>            | <i>h<sup>-</sup> ade6-M210 his3-D1 ccq1-L257R::5FLAG-kanMX6 his3<sup>+</sup>::tel(1L)</i>                                             |                                                                                                                    |
|     | TN9672           | telomere (1L):: <i>his3<sup>+</sup> ccq1-G360R</i>            | <i>h<sup>-</sup> ade6-M210 his3-D1 ccq1-G360R::5FLAG-kanMX6 his3<sup>+</sup>::tel(1L)</i>                                             |                                                                                                                    |
|     | TN9673           | telomere (1L):: <i>his3<sup>+</sup> ccq1-A363R</i>            | <i>h<sup>-</sup> ade6-M216 his3-D1 ccq1-A363R::5FLAG-kanMX6 his3<sup>+</sup>::tel(1L)</i>                                             |                                                                                                                    |
|     | TN9660           | telomere (1L):: <i>his3<sup>+</sup> ccq1-R522A, R523A</i>     | <i>h<sup>-</sup> ade6-M210 his3-D1 ccq1-R522A, R523A::5FLAG-kanMX6 his3<sup>+</sup>::tel(1L)</i>                                      |                                                                                                                    |
|     | TN9662           | telomere (1L):: <i>his3<sup>+</sup> ccq1-Y561A, R562A</i>     | <i>h<sup>-</sup> ade6-M210 his3-D1 ccq1-Y561A, R562A::5FLAG-kanMX6 his3<sup>+</sup>::tel(1L)</i>                                      |                                                                                                                    |
|     | TN9664           | telomere (1L):: <i>his3<sup>+</sup> ccq1-E645A, D646A</i>     | <i>h<sup>-</sup> ade6-M210 his3-D1 ccq1-E645A, D646A::5FLAG-kanMX6 his3<sup>+</sup>::tel(1L)</i>                                      |                                                                                                                    |
|     | TN9133           | telomere (1L):: <i>his3<sup>+</sup> ccq1Δ</i>                 | <i>h<sup>-</sup> his3-D1 ccq1Δ::hphMX his3<sup>+</sup>::tel(1L)</i>                                                                   |                                                                                                                    |
| 6B  | TN2411           | <i>ccq1<sup>+</sup></i> (no tag)                              | <i>h<sup>-</sup> his3-D1</i>                                                                                                          |                                                                                                                    |
|     | YTC6732          | <i>ccq1-FLAG</i>                                              | <i>h<sup>-</sup> his3-D1 ccq1<sup>+</sup>::5FLAG-kanMX6</i>                                                                           |                                                                                                                    |
|     | TN10611          | <i>ccq1-C163R-FLAG</i>                                        | <i>h<sup>-</sup> ade6-M210 his3-D1 ccq1-C163R::5FLAG-kanMX6</i>                                                                       |                                                                                                                    |
|     | BAM12467         | <i>ccq1-FLAG clr3Δ</i>                                        | <i>h<sup>-</sup> his3-D1 ccq1<sup>+</sup>::5FLAG-kanMX6 clr3Δ::natMX</i>                                                              |                                                                                                                    |
|     | BAM12470         | <i>ccq1-C163R-FLAG clr3Δ</i>                                  | <i>h<sup>+</sup> ade6-M210 his3-D1 ccq1-C163R::5FLAG-kanMX6 clr3Δ::natMX</i>                                                          |                                                                                                                    |
|     | TN13103          | <i>ccq1-FLAG clr4Δ</i>                                        | <i>h<sup>-</sup> his3-D1 ccq1<sup>+</sup>::5FLAG-kanMX6 clr4Δ::kanMX6</i>                                                             |                                                                                                                    |
|     | TN13106          | <i>ccq1-C163R-FLAG clr4Δ</i>                                  | <i>h<sup>-</sup> ade6-M210 his3-D1 ccq1-C163R::5FLAG-kanMX6 clr4Δ::kanMX6</i>                                                         |                                                                                                                    |
| 6C  | TN2411           | <i>clr3<sup>+</sup></i> (no tag)                              | <i>h<sup>-</sup> his3-D1</i>                                                                                                          |                                                                                                                    |
|     | TN7084           | <i>clr3-FLAG</i>                                              | <i>h<sup>+</sup> ura4-DS/E or ura4-D18 his3-D1 ccq1<sup>+</sup>::natMX clr3<sup>+</sup>::3FLAG-kanMX</i>                              |                                                                                                                    |
|     | TN12452          | <i>clr3-FLAG ccq1-C163R</i>                                   | <i>h<sup>+</sup> ura4-DS/E or ura4-D18 ade6-M210 his3-D1 ccq1-C163R::natMX clr3<sup>+</sup>::3FLAG-kanMX</i>                          |                                                                                                                    |
|     | TN12457          | <i>clr3-FLAG ccq1-A363R</i>                                   | <i>h<sup>-</sup> ura4-DS/E or ura4-D18 ade6-M216 his3-D1 ccq1-A363R::natMX clr3<sup>+</sup>::3FLAG-kanMX</i>                          |                                                                                                                    |
|     | TN12448          | <i>clr3-FLAG ccq1Δ</i>                                        | <i>h<sup>-</sup> ura4-DS/E or ura4-D18 ade6-M210 his3-D1 ccq1Δ::hphMX clr3<sup>+</sup>::3FLAG-kanMX</i>                               |                                                                                                                    |
|     | TN13101, TN13102 | <i>clr3-FLAG clr4Δ</i>                                        | <i>ura4-DS/E or ura4-D18 ade6-M210 his3-D1 clr3<sup>+</sup>::3FLAG-kanMX clr4Δ::kanMX6 (13101 h<sup>-</sup>; 13102 h<sup>+</sup>)</i> |                                                                                                                    |
| 6D  | 1                | BAM11596                                                      | <i>clr3-FLAG ccq1<sup>+</sup></i>                                                                                                     | <i>h<sup>-</sup> ura4-DS/E ade6-M210 his3-D1 clr3<sup>+</sup>::3FLAG-kanMX</i>                                     |
|     | 2                | BAM11592                                                      | <i>clr3-FLAG ccq1-myc</i>                                                                                                             | <i>h<sup>+</sup> his3-D1 ccq1<sup>+</sup>::13myc-kanMX6 clr3<sup>+</sup>::3FLAG-kanMX</i>                          |
|     | 3                | TN12844                                                       | <i>clr3-FLAG ccq1-C163R-myc</i>                                                                                                       | <i>h<sup>+</sup> ura4-DS/E or ura4-D18 ade6-M216 his3-D1 ccq1-C163R::13myc-hphMX clr3<sup>+</sup>::3FLAG-kanMX</i> |
|     | 4                | TN12848                                                       | <i>clr3-FLAG ccq1-A363R-myc</i>                                                                                                       | <i>h<sup>+</sup> ura4-DS/E or ura4-D18 ade6-M210 his3-D1 ccq1-A363R::13myc-hphMX clr3<sup>+</sup>::3FLAG-kanMX</i> |
| S1  | 1                | TN2411                                                        | wt (no tag)                                                                                                                           | <i>h<sup>-</sup> his3-D1</i>                                                                                       |
|     | 2,4              | TN7217                                                        | <i>ccq1-myc</i>                                                                                                                       | <i>h<sup>-</sup> his3-D1 ccq1+::13myc-kanMX6</i>                                                                   |
|     | 3,5              | TN7196                                                        | <i>tpz1-myc</i>                                                                                                                       | <i>h<sup>-</sup> his3-D1 tpz1+::13myc-kanMX6</i>                                                                   |
| S2  | 1                | YTC6732                                                       | <i>ccq1-FLAG</i>                                                                                                                      | <i>h<sup>-</sup> his3-D1 ccq1<sup>+</sup>::5FLAG-kanMX6</i>                                                        |
|     | 2-4              | TN13156, BAM13512, BAM13514                                   | <i>ccq1<sub>(1-436)</sub>-FLAG</i>                                                                                                    | <i>h<sup>+</sup> his3-D1 ccq1<sub>(1-436)</sub>::5FLAG-kanMX6 (13156 1x; 13512 9x; 13514 9x)</i>                   |
| S4B | TN2411           | wt (no tag)                                                   | <i>h<sup>-</sup> his3-D1</i>                                                                                                          |                                                                                                                    |
|     | YTC6732          | <i>ccq1-FLAG</i>                                              | <i>h<sup>-</sup> his3-D1 ccq1<sup>+</sup>::5FLAG-kanMX6</i>                                                                           |                                                                                                                    |
|     | TN10611          | <i>ccq1-C163R-FLAG</i>                                        | <i>h<sup>-</sup> ade6-M210 his3-D1 ccq1-C163R::5FLAG-kanMX6</i>                                                                       |                                                                                                                    |
|     | TB11538          | <i>ccq1-A363R-FLAG</i>                                        | <i>h<sup>-</sup> ade6-M216 his3-D1 ccq1-A363R::5FLAG-kanMX6</i>                                                                       |                                                                                                                    |

<sup>†</sup>All strains are *leu1-32 ura4-D18* (haploid) or *leu1-32/leu1-32 ura4-D18/ura4-D18* (diploid) unless different genotypes are indicated.

**Table S2** Yeast 2/3-hybrid Plasmids used in this study.

| Plasmid (Lab stock #)          | Description                      |
|--------------------------------|----------------------------------|
| pGBKT7 (356)                   | Empty vector                     |
| pGBKT7-Tpz1 (495)              | Tpz1-FL (full length)            |
| pGBKT7-Tpz1-[421-485] (651)    | Tpz1-[421-485]                   |
| pGADT7 (352)                   | Empty vector                     |
| pGAD-GH-Ccq1 (549)             | Ccq1-FL (full length)            |
| pGAD-GH-Ccq1-R150A (721)       | Ccq1-R150A                       |
| pGAD-GH-Ccq1-C163R (646)       | Ccq1-C163R                       |
| pGAD-GH-Ccq1-L253R (723)       | Ccq1-L253R                       |
| pGAD-GH-Ccq1-L257R (725)       | Ccq1-L257R                       |
| pGAD-GH-Ccq1-G360R (727)       | Ccq1-G360R                       |
| pGAD-GH-Ccq1-A363R (729)       | Ccq1-A363R                       |
| pGAD-GH-Ccq1-R522A,R523A (730) | Ccq1-R522A,R523A                 |
| pGAD-GH-Ccq1-Y561A,R562A (732) | Ccq1-Y561A,R562A                 |
| pGAD-GH-Ccq1-E645A,D646A (733) | Ccq1-E645A,D646A                 |
| pGBKT7-Clr3 (710)              | DBD-Clr3                         |
| pGAD-GH-Tpz1 (461)             | GAD-Tpz1                         |
| pGAD-GH-Tpz1+Ccq1 (1034)       | GAD-Tpz1 and Ccq1 (no tag)       |
| pGAD-GH-Tpz1-L449R+Ccq1 (1086) | GAD-Tpz1-L449R and Ccq1 (no tag) |

| PCR # | Primer # | Sequences (5' to 3')              |
|-------|----------|-----------------------------------|
| 1     | 637      | TATTTCTTTATTCAACTTACCGCACTTC      |
|       | 638      | CAGTAGTGCAGTGTATTATGATAATTAAAATGG |
| 2     | 483      | CTACTTACTGCACCCTAACGCACTCAAG      |
|       | 484      | ACAGTTGTGGAGCGTACTATGGTAATGA      |
| 3     | 487      | CGATTACTCGCTTTACTGCTCGTTACCC      |
|       | 488      | GGATGTAGTGCAATATGGCGAATGAGG       |
| 4     | 491      | TATCTATTACTGTCTTTACCTCTGA         |
|       | 492      | ATAAACTAATATGGTTACGGT             |
| 5     | 495      | CATCGTATGTGCGTTTATGACCACGACG      |
|       | 496      | CTAGTACTACGCCAGTGTCTTTGTCGGA      |
| 6     | 501      | TGGTGTGCTCCAAAGTGTAGTGGA          |
|       | 502      | GACAGTTGCCTCCGGTAAATGGATTC        |

**Table S4** Statistical analysis of ChIP data by 2-tailed Student's t-test.

| Figure | Genotypes and p-values <sup>1</sup> |                      |                             |                             |                              |                        |
|--------|-------------------------------------|----------------------|-----------------------------|-----------------------------|------------------------------|------------------------|
| 4C     | no tag                              | <i>myc-rad26</i>     | <i>myc-rad26 ccq1-C163R</i> | <i>myc-rad26 ccq1-A363R</i> |                              |                        |
|        | <i>myc-rad26</i>                    | 6.3x10 <sup>-3</sup> |                             |                             |                              |                        |
|        | <i>myc-rad26 ccq1-C163R</i>         | 0.011                | 9.2x10 <sup>-4</sup>        |                             |                              |                        |
|        | <i>myc-rad26 ccq1-A363R</i>         | 0.016                | 3.7x10 <sup>-3</sup>        | 0.11                        |                              |                        |
|        | <i>myc-rad26 ccq1Δ</i>              | 5.9x10 <sup>-5</sup> | 3.4x10 <sup>-6</sup>        | 0.17                        | 0.14                         |                        |
| 5A     | no tag                              | <i>ccq1-FLAG</i>     | <i>ccq1-C163R-FLAG</i>      | <i>ccq1-L253R-FLAG</i>      | <i>ccq1-L257R-FLAG</i>       | <i>ccq1-G360R-FLAG</i> |
|        | <i>ccq1-FLAG</i>                    | 1.7x10 <sup>-7</sup> |                             |                             |                              |                        |
|        | <i>ccq1-C163R-FLAG</i>              | 7.5x10 <sup>-4</sup> | 4.3x10 <sup>-5</sup>        |                             |                              |                        |
|        | <i>ccq1-L253R-FLAG</i>              | 8.5x10 <sup>-4</sup> | 1.8x10 <sup>-5</sup>        | 0.033                       |                              |                        |
|        | <i>ccq1-L257R-FLAG</i>              | 0.038                | 9.2x10 <sup>-6</sup>        | 7.8x10 <sup>-3</sup>        | 0.024                        |                        |
|        | <i>ccq1-G360R-FLAG</i>              | 6.2x10 <sup>-6</sup> | 1.1x10 <sup>-4</sup>        | 0.83                        | 3.3x10 <sup>-3</sup>         | 2.9x10 <sup>-4</sup>   |
|        | <i>ccq1-A363R-FLAG</i>              | 2.5x10 <sup>-4</sup> | 1.6x10 <sup>-4</sup>        | 0.81                        | 0.022                        | 4.1x10 <sup>-3</sup>   |
| 5B     | no tag                              | <i>trt1-myc</i>      | <i>trt1-myc ccq1-C163R</i>  | <i>trt1-myc ccq1-A363R</i>  |                              |                        |
|        | <i>trt1-myc</i>                     | 4.3x10 <sup>-3</sup> |                             |                             |                              |                        |
|        | <i>trt1-myc ccq1-C163R</i>          | 0.20                 | 1.9x10 <sup>-3</sup>        |                             |                              |                        |
|        | <i>trt1-myc ccq1-A363R</i>          | 0.20                 | 3.2x10 <sup>-3</sup>        | 0.74                        |                              |                        |
|        | <i>trt1-myc ccq1Δ</i>               | 0.39                 | 2.7x10 <sup>-5</sup>        | 5.0x10 <sup>-3</sup>        | 8.7x10 <sup>-3</sup>         |                        |
| 6B     | no tag                              | <i>ccq1-FLAG</i>     | <i>ccq1-C163R-FLAG</i>      | <i>ccq1-FLAG clr3Δ</i>      | <i>ccq1-C163R-FLAG clr3Δ</i> | <i>ccq1-FLAG clr4Δ</i> |
|        | <i>ccq1-FLAG</i>                    | 1.7x10 <sup>-7</sup> |                             |                             |                              |                        |
|        | <i>ccq1-C163R-FLAG</i>              | 7.5x10 <sup>-4</sup> | 4.3x10 <sup>-5</sup>        |                             |                              |                        |
|        | <i>ccq1-FLAG clr3Δ</i>              | 8.5x10 <sup>-7</sup> | 0.040                       | 2.3x10 <sup>-3</sup>        |                              |                        |
|        | <i>ccq1-C163R-FLAG clr3Δ</i>        | 2.7x10 <sup>-7</sup> | 9.0x10 <sup>-5</sup>        | 0.76                        | 7.3x10 <sup>-4</sup>         |                        |
|        | <i>ccq1-FLAG clr4Δ</i>              | 8.1x10 <sup>-8</sup> | 0.023                       | 1.9x10 <sup>-3</sup>        | 0.80                         | 1.9x10 <sup>-4</sup>   |
|        | <i>ccq1-C163R-FLAG clr4Δ</i>        | 7.0x10 <sup>-4</sup> | 2.9x10 <sup>-4</sup>        | 0.99                        | 5.3x10 <sup>-3</sup>         | 0.74                   |
| 6C     | no tag                              | <i>clr3-FLAG</i>     | <i>clr3-FLAG ccq1-C163R</i> | <i>clr3-FLAG ccq1-A363R</i> | <i>clr3-FLAG ccq1Δ</i>       |                        |
|        | <i>clr3-FLAG</i>                    | 5.1x10 <sup>-8</sup> |                             |                             |                              |                        |
|        | <i>clr3-FLAG ccq1-C163R</i>         | 3.0x10 <sup>-6</sup> | 1.1x10 <sup>-3</sup>        |                             |                              |                        |
|        | <i>clr3-FLAG ccq1-A363R</i>         | 6.6x10 <sup>-5</sup> | 2.3x10 <sup>-4</sup>        | 9.1x10 <sup>-3</sup>        |                              |                        |
|        | <i>clr3-FLAG ccq1Δ</i>              | 5.8x10 <sup>-3</sup> | 4.3x10 <sup>-5</sup>        | 1.2x10 <sup>-4</sup>        | 3.5x10 <sup>-3</sup>         |                        |
|        | <i>clr3-FLAG clr4Δ</i>              | 9.0x10 <sup>-7</sup> | 0.064                       | 0.016                       | 2.5x10 <sup>-3</sup>         | 3.9x10 <sup>-4</sup>   |

<sup>1</sup>Statistically significant differences (p≤0.05) are highlighted with red letters.

## SUPPLEMENTAL REFERENCES

Edgar, R.C. (2004). MUSCLE: multiple sequence alignment with high accuracy and high throughput. *Nucleic Acids Res* 32, 1792-1797.

Rhind, N., Chen, Z., Yassour, M., Thompson, D.A., Haas, B.J., Habib, N., Wapinski, I., Roy, S., Lin, M.F., Heiman, D.I., Young, S.K., Furuya, K., Guo, Y., Pidoux, A., Chen, H.M., Robbertse, B., Goldberg, J.M., Aoki, K., Bayne, E.H., Berlin, A.M., Desjardins, C.A., Dobbs, E., Dukaj, L., Fan, L., Fitzgerald, M.G., French, C., Gujja, S., Hansen, K., Keifenheim, D., Levin, J.Z., Mosher, R.A., Muller, C.A., Pfiffner, J., Priest, M., Russ, C., Smialowska, A., Swoboda, P., Sykes, S.M., Vaughn, M., Vengrova, S., Yoder, R., Zeng, Q., Allshire, R., Baulcombe, D., Birren, B.W., Brown, W., Ekwall, K., Kellis, M., Leatherwood, J., Levin, H., Margalit, H., Martienssen, R., Nieduszynski, C.A., Spatafora, J.W., Friedman, N., Dalgaard, J.Z., Baumann, P., Niki, H., Regev, A., and Nusbaum, C. (2011). Comparative Functional Genomics of the Fission Yeasts. *Science* 332, 930-936.

Wood, V., Gwilliam, R., Rajandream, M.A., Lyne, M., Lyne, R., Stewart, A., Sgouros, J., Peat, N., Hayles, J., Baker, S., Basham, D., Bowman, S., Brooks, K., Brown, D., Brown, S., Chillingworth, T., Churcher, C., Collins, M., Connor, R., Cronin, A., Davis, P., Feltwell, T., Fraser, A., Gentles, S., Goble, A., Hamlin, N., Harris, D., Hidalgo, J., Hodgson, G., Holroyd, S., Hornsby, T., Howarth, S., Huckle, E.J., Hunt, S., Jagels, K., James, K., Jones, L., Jones, M., Leather, S., McDonald, S., McLean, J., Mooney, P., Moule, S., Mungall, K., Murphy, L., Niblett, D., Odell, C., Oliver, K., O'Neil, S., Pearson, D., Quail, M.A., Rabbinowitsch, E., Rutherford, K., Rutter, S., Saunders, D., Seeger, K., Sharp, S., Skelton, J., Simmonds, M., Squares, R., Squares, S., Stevens, K., Taylor, K., Taylor, R.G., Tivey, A., Walsh, S., Warren, T., Whitehead, S., Woodward, J., Volckaert, G., Aert, R., Robben, J., Grymonprez, B., Weltjens, I., Vanstreels, E., Rieger, M., Schafer, M., Muller-Auer, S., Gabel, C., Fuchs, M., Dusterhoft, A., Fritzc, C., Holzer, E., Moestl, D., Hilbert, H., Borzym, K., Langer, I., Beck, A., Lehrach, H., Reinhardt, R., Pohl, T.M., Eger, P., Zimmermann, W., Wedler, H., Wambutt, R., Purnelle, B., Goffeau, A., Cadieu, E., Dreano, S., Gloux, S., Lelaure, V., Mottier, S., Galibert, F., Aves, S.J., Xiang, Z., Hunt, C., Moore, K., Hurst, S.M., Lucas, M., Rochet, M., Gaillardin, C., Tallada, V.A., Garzon, A., Thode, G., Daga, R.R., Cruzado, L., Jimenez, J., Sanchez, M., del Rey, F., Benito, J., Dominguez, A., Revuelta, J.L., Moreno, S., Armstrong, J., Forsburg, S.L., Cerutti, L., Lowe, T., McCombie, W.R., Paulsen, I., Potashkin, J., Shpakovski, G.V., Ussery, D., Barrell, B.G., and Nurse, P. (2002). The genome sequence of *Schizosaccharomyces pombe*. *Nature* 415, 871-880.
